# Supplementary material for: Reduced Screen Time is Associated with Healthy Dietary Behaviors but Not Body Weight Status among Polish Adolescents. Report from the Wise Nutrition—Healthy Generation Project
Source: PubMed Central journal article supplement (PMC7285006; doi:10.3390/nu12051323), 2020-05-06
Supplement: nutrients-12-01323-s001.pdf [file nutrients-12-01323-s001.pdf]

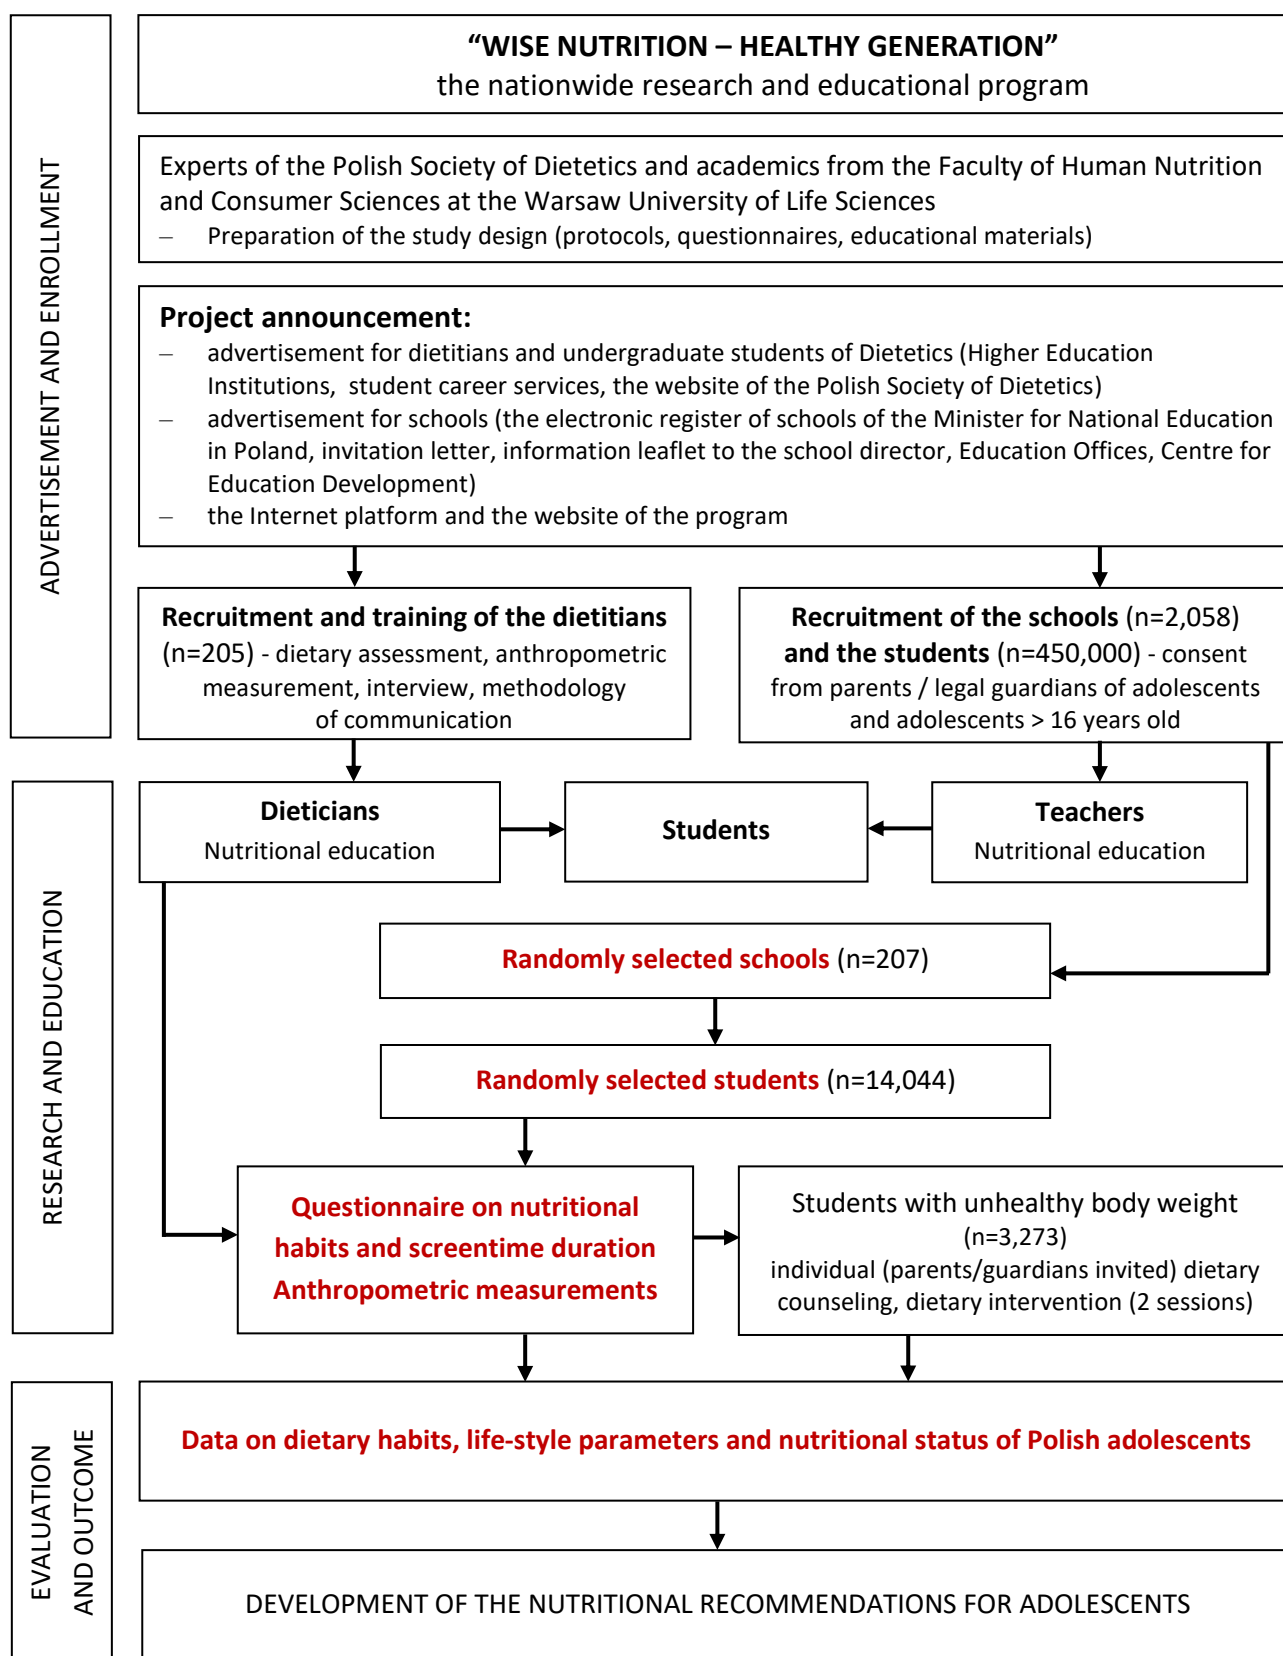

Figure 1. The Wise Nutrition - Healthy Generation project diagram (the part of the program presented in the article is marked in red).
